# Supplementary material for: Atomic layer deposition of LixTiyOz thin films
Source: Royal Society of Chemistry journal article supplement (doi:10.1039/c3ra40745d), 2013-03-08
Supplement: c3ra40745d.pdf [file c3ra40745d.pdf]

Supplementary Information for article "Atomic Layer Deposition of  $\text{Li}_x\text{Ti}_y\text{O}_z$  Thin Films" by Ville Miikkulainen, Ola Nilsen, Mikko Laitinen, Timo Sajavaara, and Helmer Fjellvåg

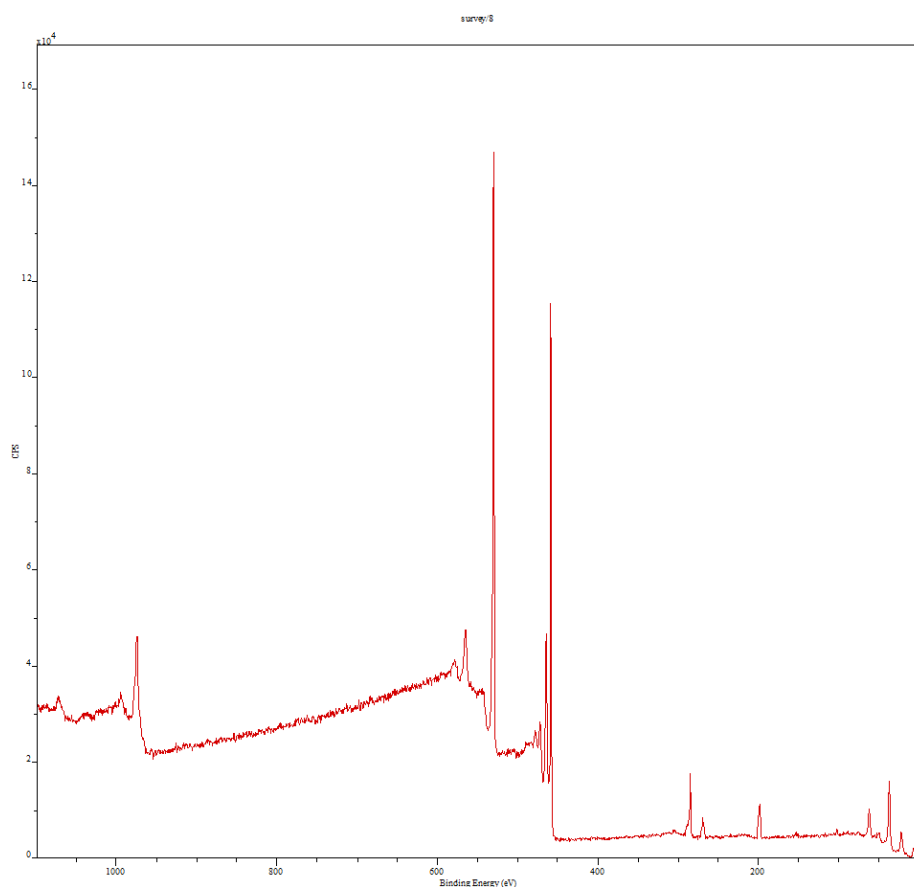

Figure 1. Survey spectrum for  $\text{TiCl}_4$ -originated film (1:2 Li:Ti pulsing ratio)

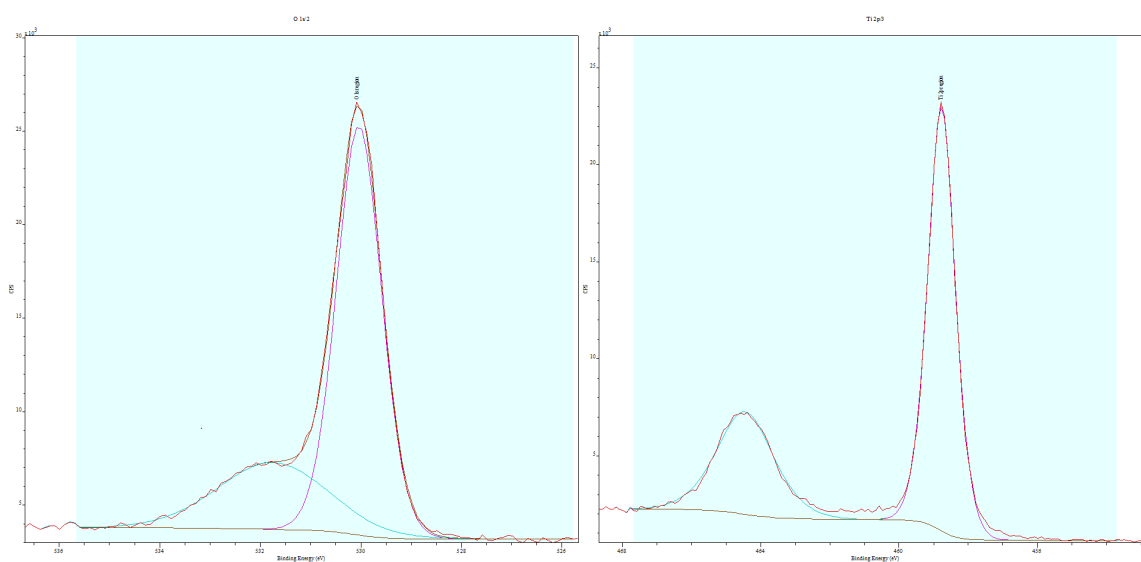

Figure 2. Detailed spectra of O 1s and Ti 2p regions for  $\text{TiCl}_4$ -originated film (1:2 Li:Ti pulsing ratio)

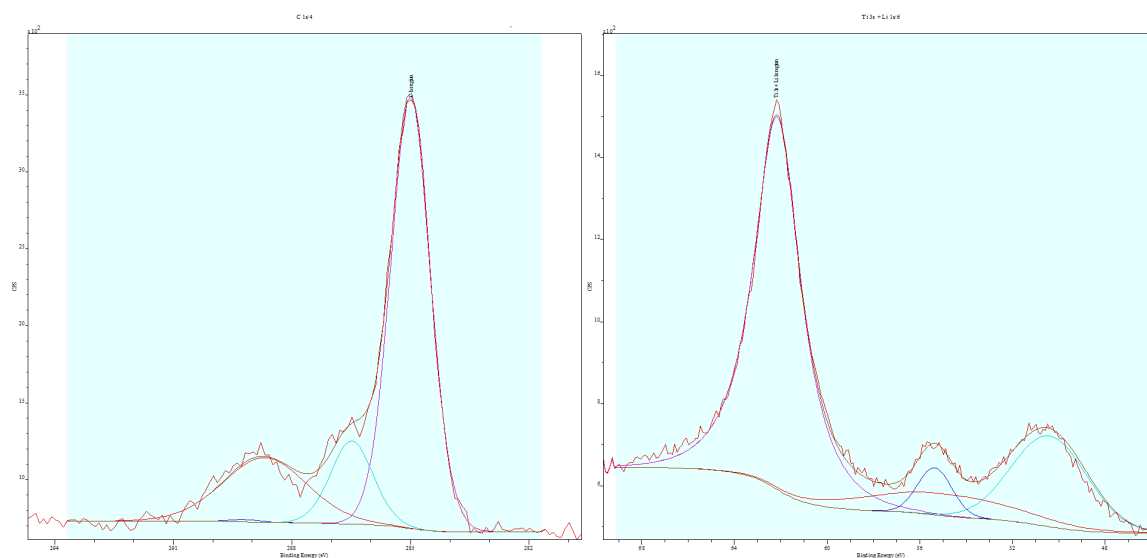

Figure 3. Detailed spectra of C 1s and Ti 3s/Li 1s regions for  $\text{TiCl}_4$ -originated film (1:2 Li:Ti pulsing ratio)

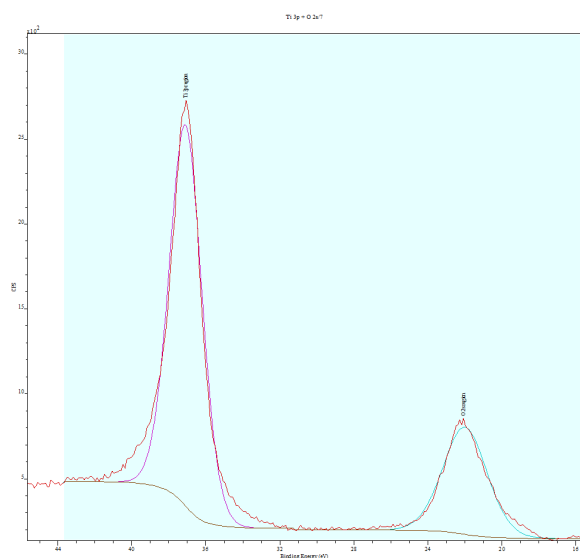

Figure 4. Detailed spectrum of Ti 3p/ O 2s region for  $\text{TiCl}_4$ -originated film (1:2 Li:Ti pulsing ratio)

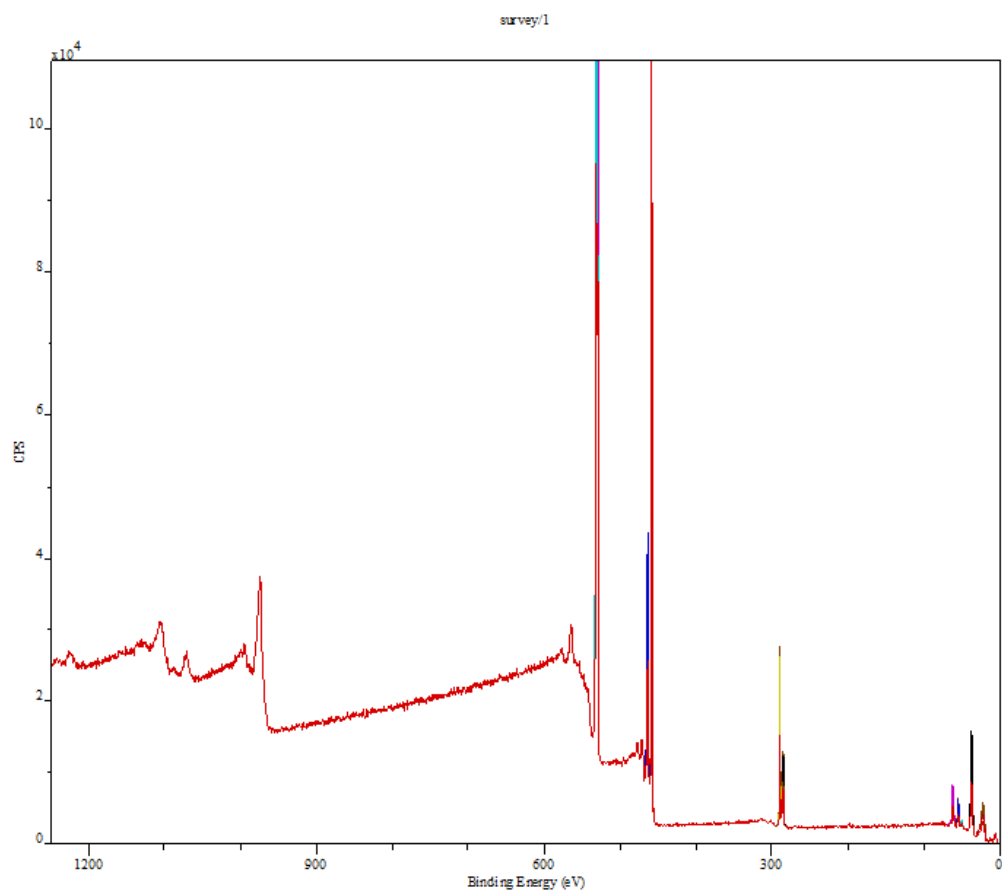

Figure 5. Survey spectrum for  $\text{Ti}(\text{O}^i\text{Pr})_4$ -originated film (1:9 Li:Ti pulsing ratio)

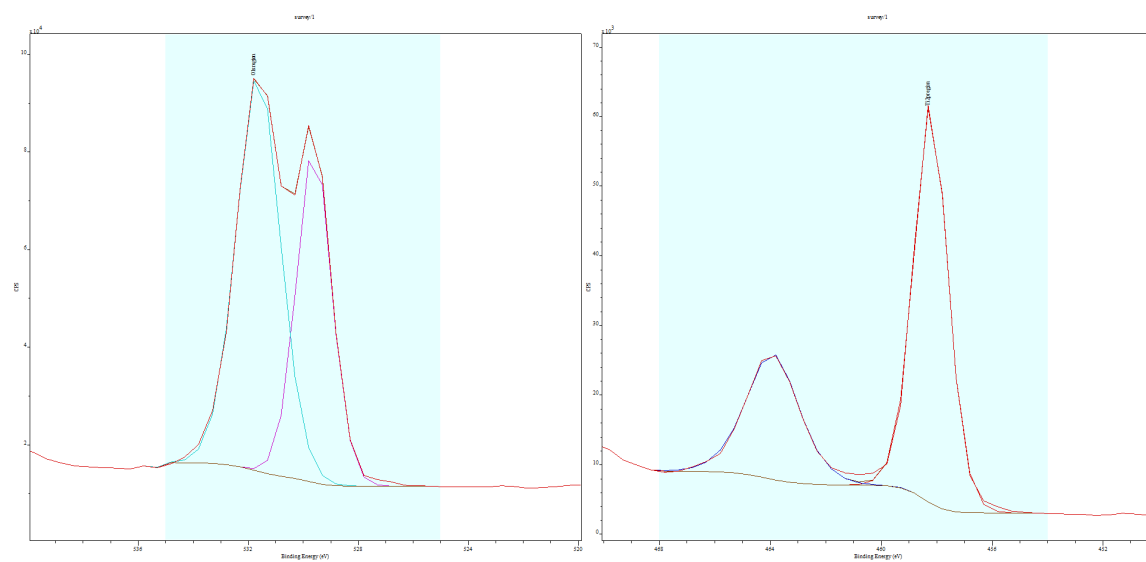

Figure 6. Detailed spectra of O 1s and Ti 2p regions for  $\text{Ti}(\text{O}^i\text{Pr})_4$ -originated film (1:9 Li:Ti pulsing ratio)

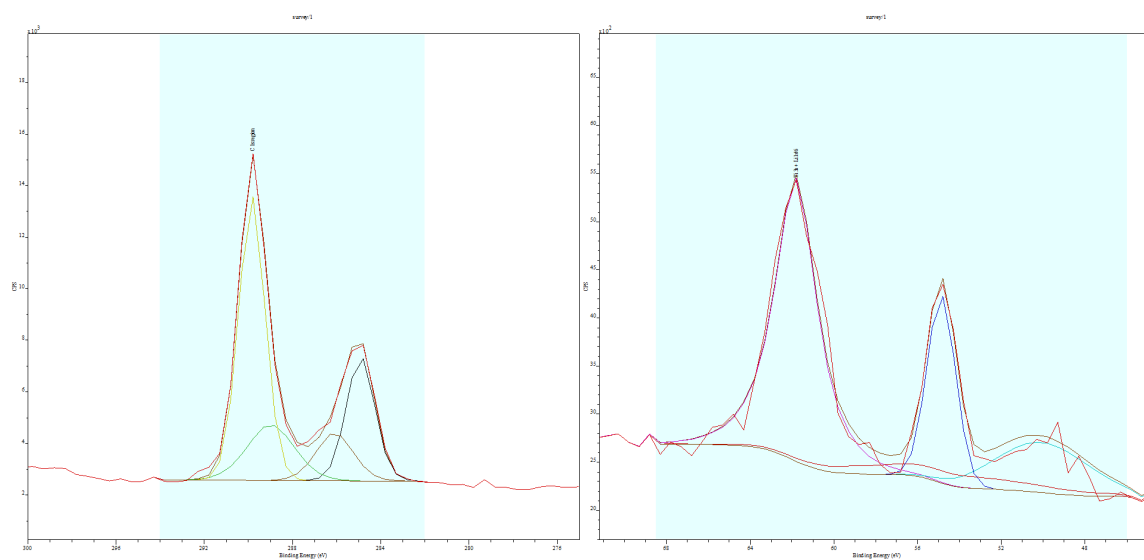

Figure 7. Detailed spectra of C 1s and Ti 3s/Li 1s regions for  $\text{Ti}(\text{O}^i\text{Pr})_4$ -originated film (1:9 Li:Ti pulsing ratio)

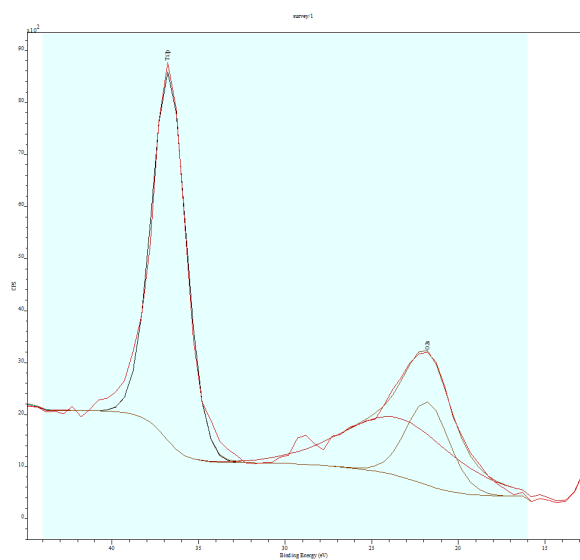

Figure 8. Detailed spectrum of Ti 3p/ O 2s region for  $\text{Ti}(\text{O}^i\text{Pr})_4$ -originated film (1:9 Li:Ti pulsing ratio)
